# Supplementary material for: Simultaneous inhibition of planktonic and biofilm bacteria by self-adapting semiconducting polymer dots
Source: Royal Society of Chemistry journal article supplement (doi:10.1039/d1tb01070k), 2021-01-01
Supplement: d1tb01070k1.pdf [file d1tb01070k1.pdf]

## **Simultaneous inhibition of planktonic and biofilm bacteria by self-adapting semiconducting polymer dots**

Xiaomei Dai\*, Jifang Ma, Qiang Zhang, Qingqing Xu, Lele Yang, Feng Gao\*

Laboratory of Functionalized Molecular Solids, Ministry of Education, Anhui Key  
Laboratory of Chemo/Biosensing, Laboratory of Biosensing and Bioimaging  
(LOBAB), College of Chemistry and Materials Science, Anhui Normal University,  
Wuhu 241002, P. R. China.

Email: [daixiaomei@mail.ahnu.edu.cn](mailto:daixiaomei@mail.ahnu.edu.cn)

Email: [fgao@mail.ahnu.edu.cn](mailto:fgao@mail.ahnu.edu.cn)

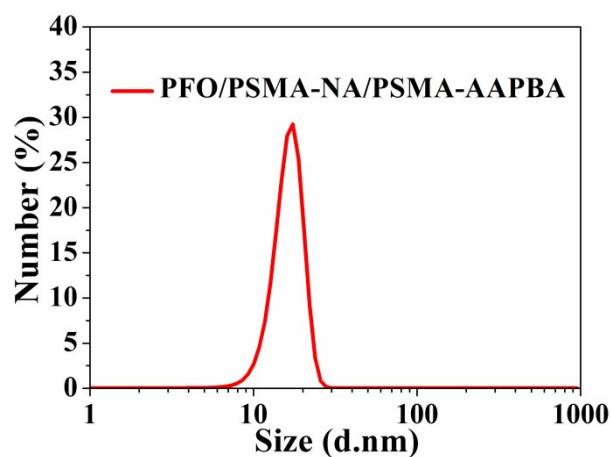

**Fig. S1** Hydrodynamic diameter of PFO/PSMA-NA/PSMA-AAPBA measured by DLS.

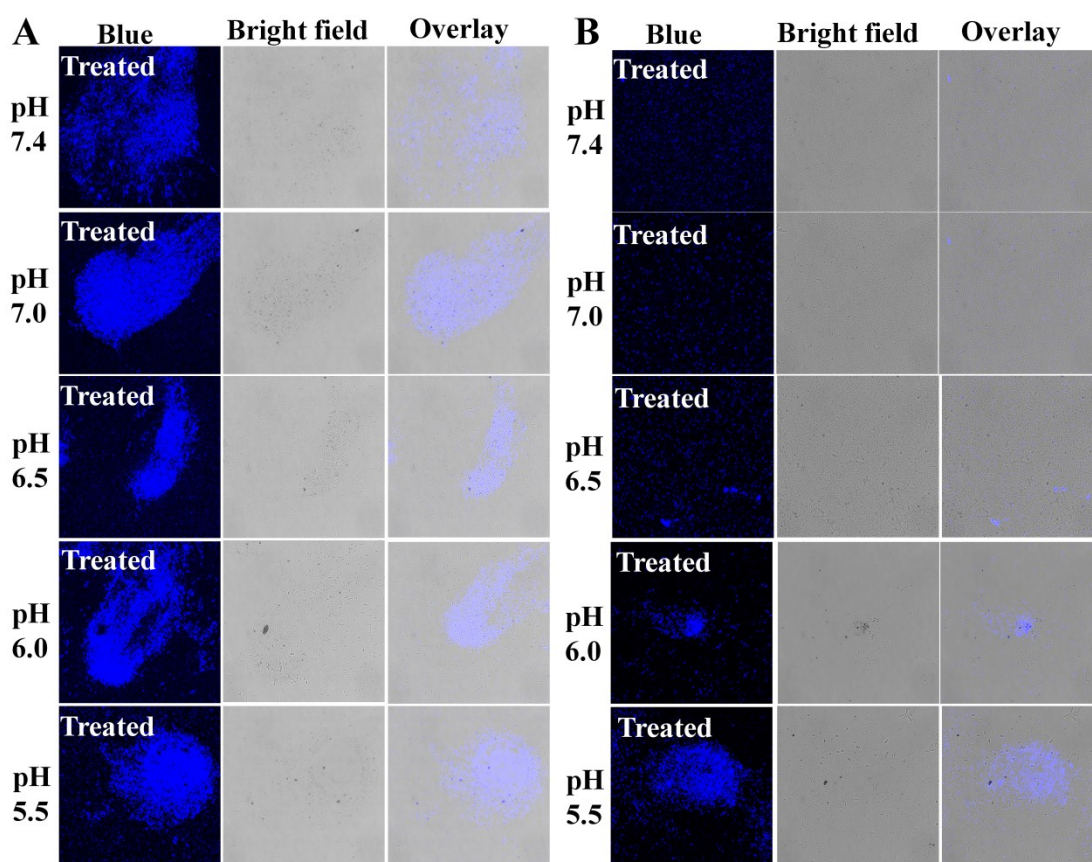

**Fig. S2** Adhesion activity to *P. aeruginosa* observed through CLSM when treated with PFO/PSMA-NA/PSMA-AAPBA (A) and PFO/PSMA-NA (B) for 30 min at different pH values, respectively.

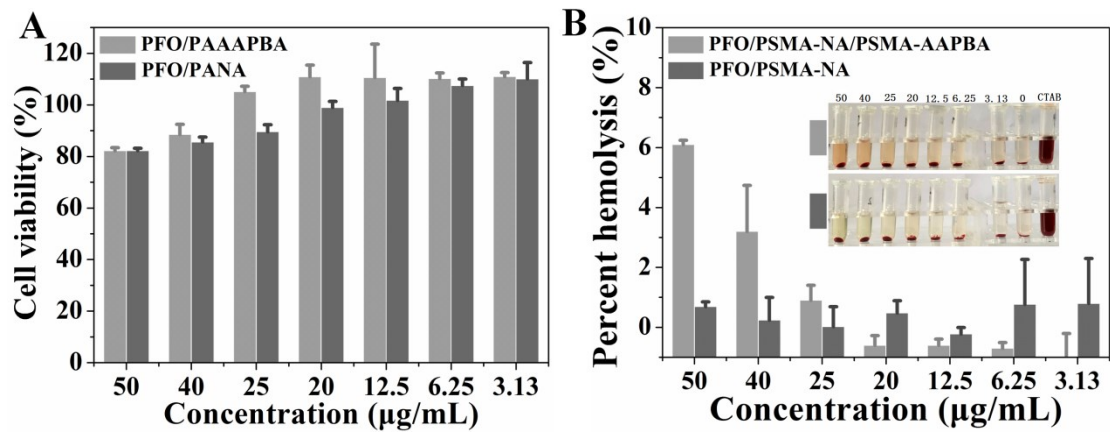

**Fig. S3** Biocompatibility of Pdots: the cell viability of HeLa cells after being treated with Pdots (A); hemolytic activity investigation of Pdots (B).

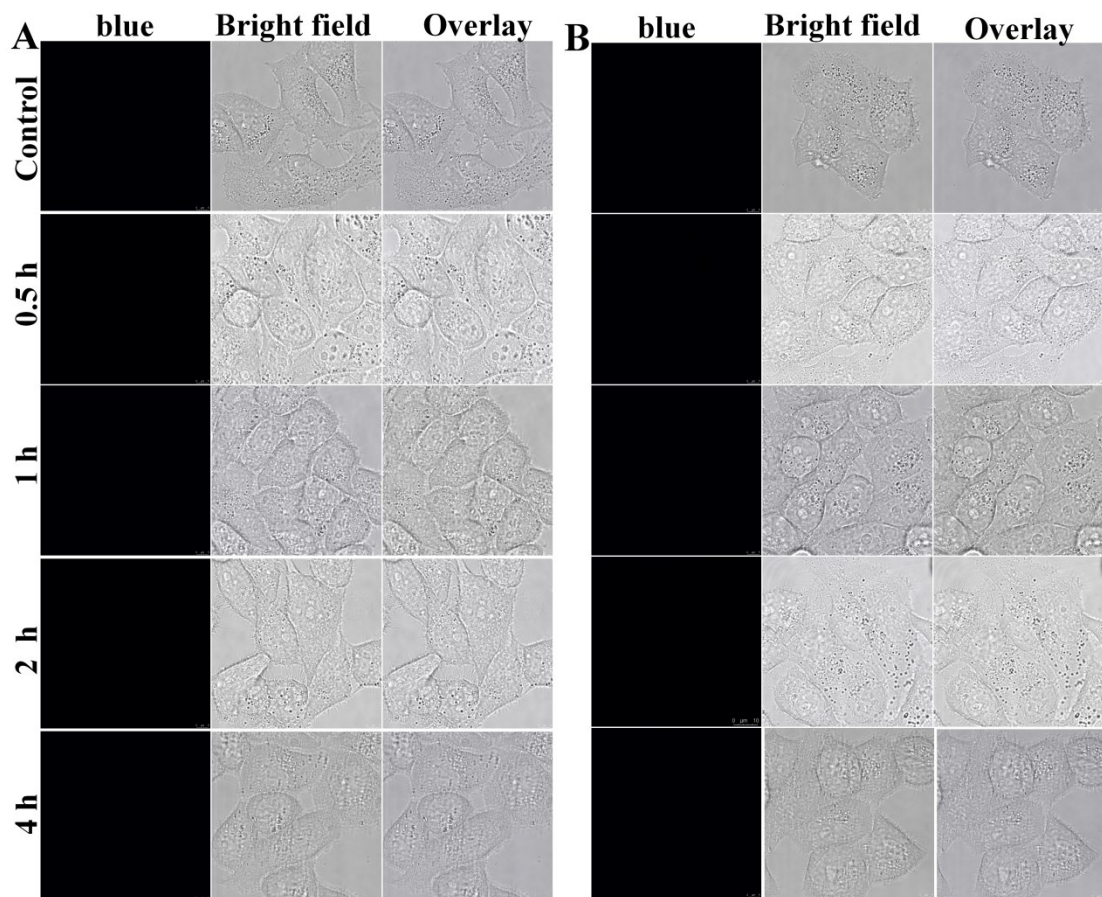

**Fig. S4** The CLSM images of HeLa cells after being treated with PFO/PMSA-NA/PMSA-AAPBA (A) and PFO/PMSA-NA (B) for 30 min at different co-cultured periods.

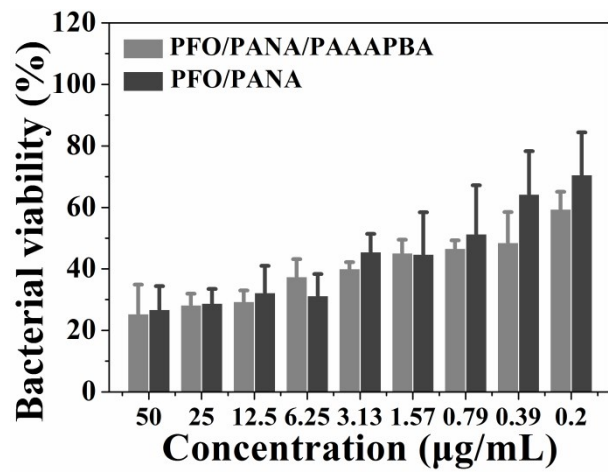

**Fig. S5** Antibacterial activity of Pdots against *P. aeruginosa*.
